# Supplementary material
Source: publisher figshare collection journal article supplement (https://tandf.figshare.com/ndownloader/files/20023700)
Supplement: Supplementary file 1 [file 20023700]

## Supplementary Material

### Supplementary figure

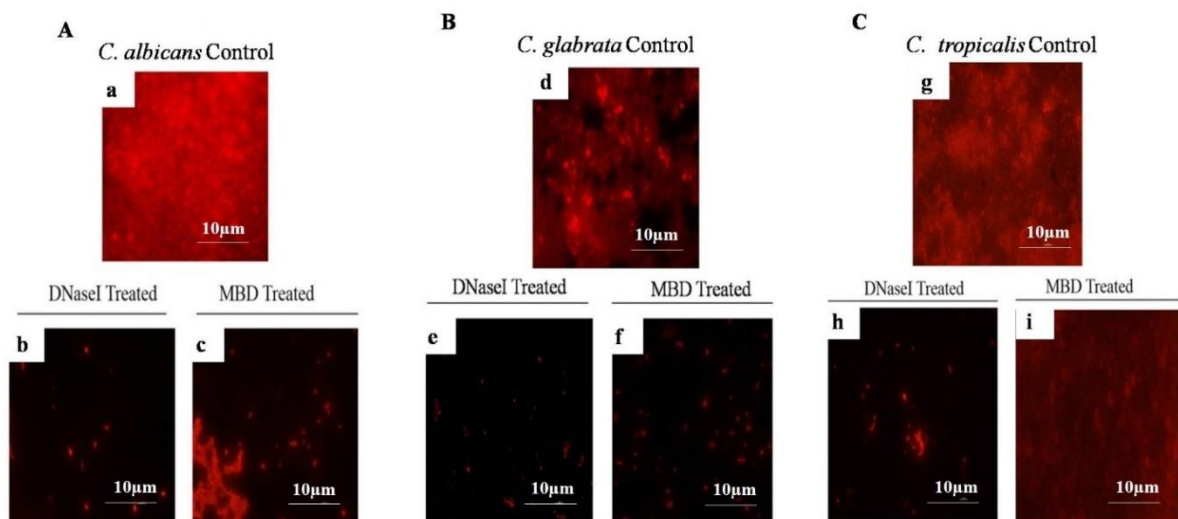

**Figure. S1** Fluorescent imaging of reduction in accumulation of e-DNA using PI staining (a) *C. albicans* control, (b) DNase I treated, (c) MBD treated, (d) *C. glabrata* control, (e) DNase I treated, (f) MBD treated, (g) *C. tropicalis* control, (h) DNase I treated, (i) MBD treated.

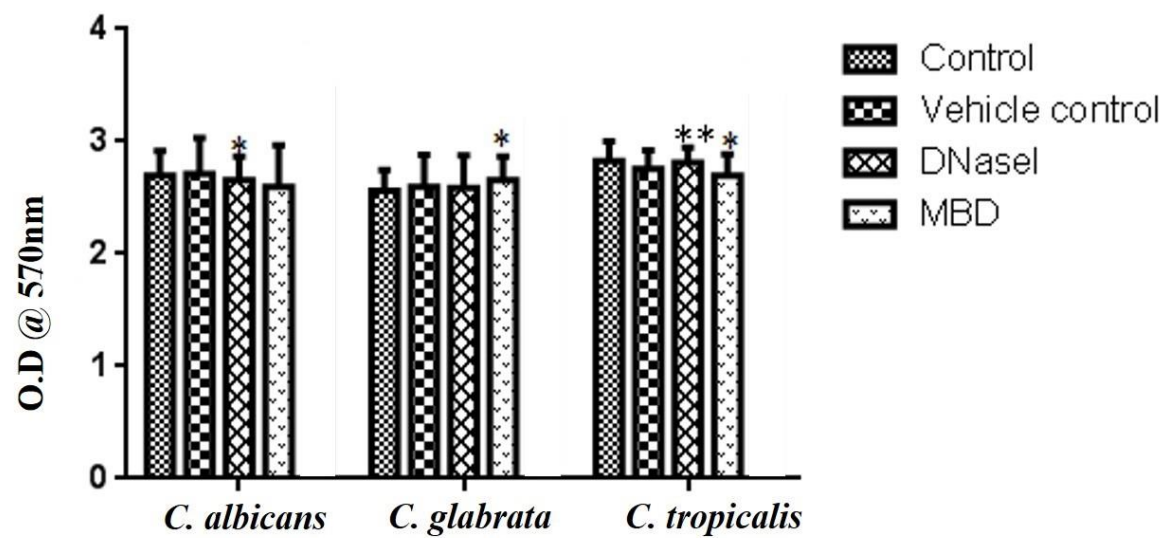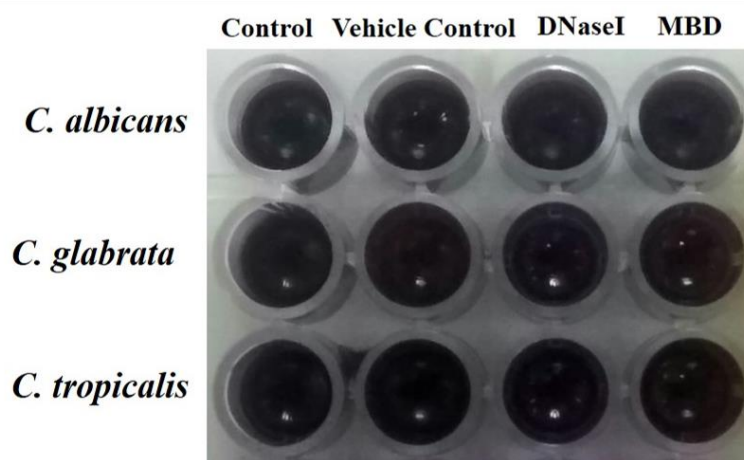

**Figure. S2** Cell viability analysis by MTT assay. One way ANNOVA test demonstrates significant difference between the control and treated. Single asterisk indicates significance at P value < 0.05.
